# Supplementary material for: Impaired coordination of nucleophile and increased hydrophobicity in the +1 subsite shift levansucrase activity towards transfructosylation
Source: PubMed Central journal article supplement — Glycobiology. 2017 Jun 16;27(8):755–65. doi: 10.1093/glycob/cwx050 (PMC5881714; doi:10.1093/glycob/cwx050), 2017-06-16
Supplement: supplementaryinformation.pdf [file supplementaryinformation.pdf]

# Supplementary figure S1

| UniProt KB | S173       | S422                               |
|------------|------------|------------------------------------|
| D5DC07     | 168 -TQEW  | SGSGT-LT- 178 418 -FTY SHFAVP- 426 |
| A0A0B6AQX6 | 168 -TQEW  | SGSAT-LT- 178 418 -FTY SHFAVP- 426 |
| A0A0B6AX67 | 168 -TQEW  | SGSAT-LT- 178 420 ---Y SHFAVP- 426 |
| D5DC38     | 205 -TQEW  | SGSAT-LT- 215 457 ---Y SHFAVP- 463 |
| A0A0M0L610 | 178 -TQEW  | SGSAT-LT- 187 428 -FTY SHFAIP- 436 |
| M5P1E7     | 168 -TQEW  | SGSAT-LT- 178 419 -FTY SHFAVP- 427 |
| A0A1C3SJ80 | 168 -TQEW  | SGSAT-LT- 178 419 -FTY SHFAVP- 427 |
| A0A1J6GYT2 | 166 -TQEW  | SGSAT-LT- 176 417 -FTY SHFAVP- 425 |
| H1AD49     | 166 -TQEW  | SGSAT-LT- 176 417 -FTY SHFAVP- 425 |
| A0A0J6EL77 | 168 -TQEW  | SGSAT-LT- 178 419 -FTY SHFAVP- 427 |
| A0A150L1X8 | 160 -TQEW  | SGSAT-LT- 170 412 ---Y SHFAVP- 418 |
| A0A0H3E6H5 | 159 -TQEW  | SGSAT-LT- 169 411 ---Y SHFAVP- 417 |
| X5A0M2     | 168 -TQEW  | SGSAT-LT- 178 424 -FTY SHFAVP- 432 |
| P05655     | 159 -TQEW  | SGSAT-FT- 169 410 ---Y SHFAVP- 416 |
| F9WBB0     | 161 -TQEW  | SGSAT-FT- 171 412 ---Y SHFAVP- 418 |
| A0A089IVM5 | 168 -TQEW  | SGSAT-LT- 178 424 -FTY SHFAVP- 432 |
| A0A150F2K5 | 159 -TQEW  | SGSAT-LT- 169 410 ---Y SHFAVP- 416 |
| A0A0D1KBL9 | 159 -TQEW  | SGSAT-FT- 169 410 ---Y SHFAVP- 416 |
| A0A0A0TXJ4 | 159 -TQEW  | SGSAT-LT- 169 410 ---Y SHFAVP- 416 |
| A0A0B2FGL3 | 168 -AEEW  | SGSAT-LT- 178 423 ---Y SHFAIP- 429 |
| A0A0Q9MRD7 | 168 -AEEW  | SGSAT-LT- 178 424 ---Y SHFAVP- 430 |
| R4K861     | 167 -TQEW  | SGSAT-LT- 177 425 ---Y SHFAVP- 431 |
| A0A0F7F8Z7 | 168 -TQEW  | SGSAT-LT- 178 424 -FTY SHFAVP- 432 |
| M9TNM8     | 159 -TQEW  | SGSAT-LT- 169 410 ---Y SHFAVP- 416 |
| A0A1J6F5C5 | 159 -TQEW  | SGSAT-FT- 169 410 ---Y SHFAVP- 416 |
| A0A172XPM6 | 179 -TQEW  | SGSAT-FT- 189 430 ---Y SHFAVP- 436 |
| A0A0Q7J931 | 168 -AEEW  | SGSAT-LT- 178 424 ---Y SHFAVP- 430 |
| A0A0Q9K3K8 | 168 -AEEW  | SGSAT-LT- 178 424 ---Y SHFAVP- 430 |
| A0A0D7XQE2 | 159 -TQEW  | SGSAT-FT- 169 410 ---Y SHFAVP- 416 |
| R4K9X0     | 167 -AEEW  | SGSAT-LT- 177 423 TFTY SHFAVP- 432 |
| X4ZKX5     | 168 -AEEW  | SGSAT-LT- 178 423 ---Y SHFAVP- 429 |
| A0A089HVL6 | 168 -AEEW  | SGSAT-LT- 178 423 ---Y SHFAIP- 429 |
| A0A0E4CZK7 | 176 -AEEW  | SGSAT-LT- 186 431 ---Y SHFAIP- 437 |
| A0A0Q9S332 | 168 -AEEW  | SGSAT-LT- 178 422 ---Y SHFAVP- 428 |
| A0A089LUD0 | 168 -AEEW  | SGSAT-LT- 178 423 ---Y SHFAIP- 429 |
| A0A0F7F9T7 | 168 -AEEW  | SGSAT-LT- 178 423 ---Y SHFAIP- 429 |
| A0A0H3J194 | 168 -TQEW  | SGSAT-LT- 177 425 -FTY SHFAIP- 433 |
| A0A0M3RAN0 | 168 -TQEW  | SGSAT-LT- 178 426 FN-Y AHFVIP- 434 |
| A0A089HRP3 | 168 -GEEW  | SGSAT-LT- 178 423 ---Y SHFAIP- 429 |
| R4KCF3     | 171 -AEEW  | SGSAT-LT- 181 425 -FTY SHFAVP- 433 |
| A0A0D5NQ05 | 168 -AEEW  | SGSAT-LT- 178 424 ---Y AHFAIP- 430 |
| V6IV04     | 167 -TQEW  | SGSAT-LT- 176 424 -FTY SHFAVP- 432 |
| A0A0M2P9I7 | 169 -TEEW  | SGSAT-LT- 179 425 ---Y AHFAIP- 431 |
| A0A0D5NDA2 | 168 -AEEW  | SGSAT-MT- 178 423 ---Y AHFAIP- 429 |
| A0A0L8F229 | 165 -TQEW  | SGSAT-LT- 175 422 -FTY SHFAVP- 430 |
| A0A117T1Y9 | 166 -SEEW  | SGSAT-LT- 176 421 ---Y AHFATP- 427 |
| V6J0B5     | 168 -AEEW  | SGSAT-LT- 178 421 ---Y SHFAVP- 427 |
| A0A179T2D2 | 169 -AEEW  | SGSAT-FT- 179 424 ---Y AHFAIP- 430 |
| A0A168MGV8 | 168 -AEEW  | SGSAT-MT- 178 425 ---Y AHFAIP- 431 |
| A0A0H3J026 | 167 -AEEW  | SGSAT-LT- 177 427 ---Y SHFAVP- 433 |
| A0A0J1LQ9  | 169 -AEEW  | SGSAT-FT- 179 425 ---Y AHFAIP- 431 |
| A0A1D9MY97 | 152 -AEEW  | SGSAT-LT- 162 412 ---Y SHFAVP- 418 |
| A0A176J9D4 | 167 -DQDQ  | SGSAI-MT- 177 418 FN-Y AHYAIP- 426 |
| Q97I81     | 165 -TQEW  | SGSAT-LT- 175 425 ---Y SHFAVP- 431 |
| W4D9G7     | 170 -AEEW  | SGSAT-MT- 180 427 ---Y AHFAIP- 433 |
| A0A0U1QN00 | 158 -AEEW  | SGSAT-LT- 168 413 ---Y SHFAVP- 419 |
| A0A0M4GC52 | 157 -SEEW  | SGSAT-LT- 167 412 ---Y AHFVIP- 418 |
| A0A098FE22 | 169 -AEEW  | SGSAT-FT- 179 425 ---Y AHYAIP- 431 |
| A0A0H4KA09 | 169 -AEEW  | SGSAT-FT- 179 426 ---Y AHYAIP- 432 |
| G7VYN5     | 168 -SEEW  | SGSAT-LT- 178 422 ---Y AHFAIP- 428 |
| A0A172ZF36 | 189 -SEEW  | SGSAT-LT- 198 444 ---Y AHFAIP- 450 |
| E0RG62     | 221 -SEEW  | SGSAT-LT- 231 475 ---Y AHFAIP- 481 |
| A0A160IQP4 | 168 -SEEW  | SGSAT-FT- 178 424 ---Y AHYAIP- 430 |
| A0A074LH66 | 168 -SEEW  | SGSAT-LT- 178 422 ---Y AHFAIP- 428 |
| A0A084GQ00 | 169 -SEEW  | SGSAT-FT- 179 425 ---Y AHYAIP- 431 |
| A0A0V8IYB9 | 168 -SEEW  | SGSAT-FT- 178 424 ---Y AHYVIP- 430 |
| O82854     | 169 -TQEW  | SGSAT-LT- 179 426 HTY SHCGIP- 434  |
| A0A1E3L5N1 | 186 -SEEW  | SGSAT-MT- 196 441 ---Y AHFAIP- 447 |
| A0A0D7X3V9 | 168 -AEEW  | SGSAT-LT- 178 422 ---Y AHFAIP- 428 |
| A0A0H3J4D7 | 339 -TEEW  | SGSAT-LT- 348 597 FT-Y SHFAIP- 605 |
| A0A0M4FKS3 | 147 -TQEW  | SGSAT-LT- 156 406 ---Y AHFVIP- 412 |
| E6U567     | 163 -TEEW  | SGSAT-LT- 172 415 TFTY SYAIP- 424  |
| A0A0V8JJC4 | 174 -IEEW  | SGSAL-FT- 184 430 ---Y AHYVIP- 436 |
| A0A024PB57 | 168 -SEEW  | SGSAT-FT- 178 426 ---Y AHYVIP- 432 |
| A0A0M0G105 | 166 -VEEW  | SGSAT-LT- 176 422 ---Y AHYVIP- 428 |
| A0A075LN24 | 170 -QEEW  | SGSAA-FI- 180 425 ---Y AHYVIP- 431 |
| A0A0N1T3P2 | 300 -KQWQ  | SGSAT-V- 309 552 TDTY SYAYVP- 561  |
| A0A0N1U2Q0 | 313 -EQWQ  | SGSAT-V- 322 565 TDTY SYAYVP- 574  |
| A0A192S224 | 312 -EQWQ  | SGSAT-V- 321 564 TDTY SYAYVP- 573  |
| Q03WB9     | 315 -QQWQ  | SGSAT-V- 324 567 TDTY SYAYVP- 576  |
| Q70XJ9     | 377 -YQEW  | SGSAI-V- 386 638 TATY SYAYVP- 647  |
| G2KVB82    | 378 -YQEW  | SGSAI-V- 387 639 TATY SYAYVP- 648  |
| A0A0K8MV50 | 181 -VGEW  | SGSTV-LM- 191 446 ---Y SYLVIP- 452 |
| A0A0K8MPC0 | 181 -VGEW  | SGSTV-LM- 192 446 ---Y SYLVIP- 452 |
| Q8GGV4     | 315 -FQEW  | SGSAI-V- 324 576 TATY SYAYVP- 585  |
| Q03WB8     | 297 -SQWQ  | SGSAT-V- 306 548 TNSY SYAYVP- 557  |
| I0QHA9     | 344 -DQWQ  | SGSAT-V- 353 613 TSTY SYAYVP- 622  |
| B3XLE9     | 331 -TQEW  | SGSAI-V- 340 591 TATY SYAYVP- 600  |
| A0A0R1PF10 | 258 -YQEW  | SGSAI-V- 267 519 TATY SYAYVP- 528  |
| F8DRCO     | 129 -TQEW  | SGSAI-V- 138 388 TATY SYAYVP- 397  |
| Q683P2     | 336 -TQEW  | SGSAI-V- 345 595 TATY SYAYVP- 604  |
| E9DPX9     | 323 -DQWQ  | SGSAT-V- 332 592 TSTY SYAYVP- 601  |
| D3WYWO     | 315 -LQEW  | SGSAI-V- 324 578 TATY SYAYVP- 587  |
| A0A0R1X7N7 | 245 -FQEW  | SGSAI-V- 254 506 TATY SYAYVP- 515  |
| A0A081NSP0 | 129 -SQEW  | SGSAV-L- 138 389 TATY SYAYVP- 398  |
| TOVB16     | 150 -DQWQ  | SGSAT-V- 159 419 TSTY SYAYVP- 428  |
| A0A0U5K6W0 | 336 -SQEW  | SGSAV-L- 345 596 TATY SYAYVP- 605  |
| A0A074IZ03 | 351 -DQWQ  | SGSAT-V- 360 620 TSTY SYAYVP- 629  |
| A0A0E2EKC5 | 310 -TQEW  | SGSAT-V- 319 572 TATY SYAYVP- 581  |
| A0A0R1WJH5 | 270 -LQWQ  | SGSAT-L- 279 535 TATY SYAYVP- 544  |
| D6S431     | 318 -LQWQ  | SGSAV-V- 327 577 TATY SYAYVP- 586  |
| V5P4J0     | 335 -IQWQ  | SGSAT-L- 344 597 TATY SYAYVP- 606  |
| J3JQ55     | 340 -TQWQ  | SGSAT-V- 349 602 TATY SYAYVP- 611  |
| F4AFU1     | 294 -LQEW  | SGSAI-V- 303 557 TATY SYAYVP- 566  |
| A0A1B3PWG6 | 135 -LQEW  | SGSAI-V- 144 398 TATY SYAYVP- 407  |
| A0A0U5JV84 | 327 -SQEW  | SGSAV-L- 336 587 TATY SYAYVP- 596  |
| C2EU18     | 276 -HQWQ  | SGSAT-K- 285 536 TSTY SYAYVP- 545  |
| A0A0R1YAN1 | 365 -HQRW  | SGSAC-V- 374 624 TATY SYAYVP- 633  |
| G5JYF4     | 360 -TQWQ  | SGSAT-V- 369 622 TATY SYAYVP- 631  |
| J9YHQ1     | 299 -NQEWE | SGSAT-L- 308 555 ADTY SYAYVP- 564  |
| A0A0R1S7U0 | 293 -LQWQ  | SGSAV-V- 302 552 TATY SYAYVP- 561  |
| A0A087QE01 | 137 -IQWQ  | SGSAT-L- 146 399 TATY SYAYVP- 408  |
| D3WYV9     | 329 -IQWQ  | SGSAT-L- 338 591 TATY SYAYVP- 600  |
| Q7X481     | 420 -SQEW  | SGSAV-V- 429 670 TNTY SYAYVP- 679  |
| A0A0U3F832 | 366 -EQWQ  | SGSAT-V- 375 635 TSTY SYAYVP- 644  |
| A0A175D284 | 342 -NQEWE | SGSAT-L- 351 598 TDTY SYAYVP- 607  |
| A0A175CSP9 | 277 -NQEWE | SGSAT-L- 286 533 TDTY SYAYVP- 542  |
| A0A175CN55 | 167 -NQEWE | SGSAT-L- 176 423 TDTY SYAYVP- 432  |
| A0A0R1XZ34 | 292 -RQEWE | SGSAT-V- 301 554 TATY SYAYVP- 563  |
| A0A0R1XTI2 | 333 -AQEW  | SGSAT-V- 342 593 TSTY SYAYVP- 602  |
| A0A139NH8  | 342 -TQWQ  | SGSAA-V- 351 604 TATY SYAYVP- 613  |
| A0A0R1UH55 | 226 -DQEWE | SGSAT-V- 235 484 TATY SYAYVP- 493  |
| A0A0R1NSL5 | 320 -SQEW  | SGSAT-V- 329 580 TSTY SYAYVP- 589  |
| A0A0R2HHK9 | 192 -KSEWE | SGSTTMMH-203 455 ---Y AYLAVR- 461  |
| A0A1C2D650 | 308 -DQEWE | SGSAT-M- 317 568 TSTY SYAYVP- 577  |
| A0A109DGA4 | 302 -DQEWE | SGSAT-V- 311 562 TSTY SYAYVP- 571  |
| A0N159     | 353 -AEQW  | SGSAV-L- 362 609 TFTY SYAIP- 618   |
| A0A0R2DDE0 | 84 -IQWQ   | SGSAT-L- 93 360 TATY SYAYVP- 369   |
| A0A0R1WQB6 | 365 -TGHW  | SGSAT-V- 374 624 TATY SYFAVK- 633  |
| A0A0R2HFP4 | 339 -QQEW  | SGSTVMLH- 350 605 TETV SFYPI- 614  |
| GRWIM3     | 375 -SQWQ  | SGSAI-L- 384 636 TATY SYFAIK- 644  |
| R9X6M9     | 140 -DQEWE | SGSAY-PL- 150 435 TATY SYAYVP- 445 |
| D2WS87     | 354 -DQEWE | SGSAY-PL- 364 650 TATY SYAYVP- 659 |
| A0A165YU9  | 355 -DQEWE | SGSAY-PL- 365 651 TATY SYAYVP- 660 |
| K0NZZ7     | 401 -TGWQ  | SGSAM-L- 410 670 TATY SYAYVP- 679  |
| A0A1JOCKW0 | 406 -DQEWE | SGSAY- 414 702 TATY SYAYVP- 711    |
| D8FQV7     | 384 -TGWQ  | SGSAM-L- 393 653 TATY SYAYVP- 662  |
| A0A0R2N919 | 384 -TGWQ  | SGSAM-L- 393 653 TATY SYAYVP- 662  |
| F0HVA2     | 387 -TGWQ  | SGSAM-L- 396 656 TATY SYAYVP- 665  |
| A0A0R1MDC7 | 366 -TGWQ  | SGSAM-L- 375 635 TATY SYAYVP- 644  |
| A0A0N0CQ12 | 296 -TQWQ  | SGSAVKLD- 307 627 ---Y SYIMPT- 634 |
| A0A0R1FW02 | 83 -TGWQ   | SGSAM-L- 92 352 TATY SYAYVP- 361   |
| L5NBP0     | 547 -SRQW  | AGSAM-V- 556 770 YQTY SWTVMP- 779  |
| A0A0Q9LAQ7 | 142 -SRQW  | AGSSV-V- 151 374 YQTY SWTVMP- 383  |
| A0A0J5X6D2 | 190 -DNAEW | SGSAR-L- 200 450 FQSY SHYVMP- 459  |
| B1T3G3     | 174 -NNAEW | SGSAR-L- 184 434 FQSY SHYVMP- 443  |
| A0A1B4B4C5 | 175 -NNAEW | SGSAR-L- 185 435 FQSY SHYVMP- 444  |
| A0A118HU84 | 191 -NNAEW | SGSAR-L- 201 451 FQSY SHYVMP- 460  |
| A0A0B0D7L4 | 142 -SRQW  | AGSAM-M- 151 376 FQSY SHYVMP- 385  |
| A0A087N2I9 | 191 -NNAEW | SGSAR-L- 201 451 FQSY SHYVMP- 460  |
| A0A0B0D3D8 | 123 -SRQW  | AGSAM-I- 132 357 YQTY SWTVMP- 366  |
| A0A0D0GZ86 | 191 -NNAEW | SGSAR-L- 201 451 FQSY SHYVMP- 460  |
| A0A071MG51 | 190 -NNAEW | SGSAR-L- 200 450 FQSY SHYVMP- 459  |
| L5N6Q3     | 139 -SRQW  | AGSAM-L- 148 366 FQTY SHVLP- 375   |
| A0A081VAY8 | 190 -NNAEW | SGSAR-L- 200 450 FQSY SHYVMP- 459  |
| L5N874     | 137 -SRQW  | AGSAM-M- 146 372 YQTY SWTVMP- 381  |
| A2ZV58     | 206 -NNAEW | SGSAR-L- 216 466 FQSY SHYVMP- 475  |
| Q2T433     | 178 -NNAEW | SGSAR-L- 188 438 FQSY SHYVMP- 447  |
| A0A103U6L5 | 190 -NNAEW | SGSAR-L- 200 450 FQSY SHYVMP- 459  |
| A0A096YXB8 | 192 -NNAEW | SGSAR-L- 202 452 FQSY SHYVMP- 461  |
| I2DV73     | 174 -NNAEW | SGSAR-L- 184 434 FQSY SHYVMP- 443  |
| A0A088TRL1 | 190 -NNAEW | SGSAR-L- 200 450 FQSY SHYVMP- 459  |
| A0A0D6LVE5 | 163 -NNAEW | SGSAR-L- 173 423 FQSY SHYVMP- 432  |
| A0A1J0T6D0 | 168 -HQTQW | SGSAR-I- 178 428 FQSY SHYVMP- 437  |
| A0A1J0SIU6 | 201 -HQTQW | SGSAR-I- 211 461 FQSY SHYVMP- 470  |
| A0A1J0S6W7 | 187 -HQTQW | SGSAR-I- 197 447 FQSY SHYVMP- 456  |
| A0A0J5GNX9 | 121 -HMWQ  | AGSAM-L- 130 366 FQAY SWVAAP- 375  |
| A0A095E6N9 | 190 -NNAEW | SGSAR-L- 200 450 FQSY SHYVMP- 459  |
| U2G5V0     | 151 -NNAEW | SGSAR-L- 161 411 FQSY SHYVMP- 420  |
| B1G3X6     | 195 -QNAEW | SGSAR-L- 205 455 FQSY SHYVMP- 464  |
| A0A0J6MDB3 | 190 -NNAEW | SGSAR-L- 200 450 FQSY SHYVMP- 459  |
| A0A0D5L6T3 | 188 -NNAEW | SGSAR-L- 198 448 FQSY SHYVMP- 457  |
| A0A0S3EPZ1 | 185 -HQTQW | SGSAR-I- 195 444 FQSY SHYVMP- 453  |
| R4KDH7     | 146 -SRQW  | AGSAM-L- 155 378 YQTY SWTVMP- 387  |
| A0A151A9R2 | 144 -HHQW  | AGSAM-Y- 153 358 FQAY SWLAMP- 367  |
| A0A157ZW82 | 189 -NNAEW | SGSAR-L- 199 449 FQSY SHYVMP- 458  |
| A0A0P9EBQ6 | 145 -HMWQ  | AGTAM-L- 154 389 YQAY SWMLVP- 398  |
| A0A0X0SMM9 | 93 -SRQW   | AGSAM-M- 102 328 YQAY SWLVP- 337   |
| W0JW88     | 143 -HHQW  | AGSAM-Y- 152 357 FQYS SWLAMP- 366  |
| A0A0A6Q5Q9 | 184 -NNAEW | SGSAR-F- 194 444 FQSY SHYVMP- 453  |
| L9XHV2     | 143 -HHQW  | AGSAM-Y- 152 357 FQYS SWLAMP- 366  |
| BZJYV2     | 195 -DNAEW | SGSAR-L- 205 455 FQSY SHYVMP- 464  |
| MOGZM4     | 115 -HHQW  | AGSAM-Y- 124 329 FQAY SWLAMP- 338  |
| A0A154UZ40 | 187 -QQAWE | SGSTR-I- 197 446 FQAY SSYLP- 455   |
| A0A0W1R697 | 118 -SRQW  | AGSAL-Y- 127 335 FQAY SWLAYD- 344  |
| MOBV67     | 135 -HHQW  | AGSAM-Y- 144 349 FQAY SWLAMP- 358  |
| G7LSK3     | 149 -AREW  | AGTPV-LL- 159 371 YQTY SHYVMP- 380 |
| A0A0H0SLX3 | 123 -HMWQ  | AGTAM-L- 132 359 YQAY SWMLVP- 368  |
| A0A1H8VTP1 | 144 -HHQW  | AGSAM-Y- 153 358 FQAY SWLAMP- 367  |
| D2S0N4     | 144 -HHQW  | AGSAM-Y- 153 358 FQAY SWLAMP- 367  |
| A0A0U3PY74 | 181 -HQTQW | SGSAR-V- 191 440 FQAY SHYVMP- 449  |
| A0A0M2HA26 | 200 -HQTQW | SGSAR-I- 210 459 FQAY SHYVMP- 468  |
| LZ2Z73     | 144 -HHQW  | AGSAM-Y- 153 358 FQYS SWLAMP- 367  |
| E7QM02     | 109 -HHQW  | AGSAM-Y- 118 323 FQAY SWLAMP- 332  |
| A0A166RTL7 | 111 -SRQW  | AGSAL-L- 120 327 FQAY SWLAMP- 336  |
| A0A0N9JHF5 | 191 -HQTQW | SGSAR-V- 201 450 FQAY SHYVMP- 459  |
| A0A1B1BID6 | 194 -HQTQW | SGSAR-V- 204 452 FQAY SHYVMP- 461  |
| A0A0G4JRN2 | 146 -TREW  | AGTPI-LL- 156 368 FQTY SHYVMP- 377 |



**Supplementary figure S1.** Extract of the ranked multiple sequence alignment (367 sequences) created for family 68 showing positions S173 and S422; highlighted sequences: D5DC07 *B. megaterium* levansucrase (orange); P05655 *B. subtilis* levansucrase (green).

**Supplementary table S1.** Amino acid distribution of the mutated positions in the created datasets of GH families 68 and 32; values are given in %.

| Family 68 (367 sequences) |     |     |     |     |       | Family 32 (3951 sequences) |     |     |     |       |
|---------------------------|-----|-----|-----|-----|-------|----------------------------|-----|-----|-----|-------|
| position                  | Ser | Ala | Gly | Thr | other | Ser                        | Ala | Gly | Thr | other |
| S173                      | 67  | 33  | -   | -   | -     | 80                         | <1  | <1  | 17  | 3     |
| S422                      | 92  | 8   | -   | -   | -     | <1                         | 94  | 4   | <1  | 1     |

  

| position | Tyr | Phe | Trp | other | Tyr | Phe | Trp | other |
|----------|-----|-----|-----|-------|-----|-----|-----|-------|
| Y421     | 100 | -   | -   | -     | 97  | 1   | -   | 2     |
| Y439     | 38  | 61  | -   | 1     | 2   | <1  | 96  | 2     |

**Supplementary table SII.** Oligonucleotides for creation of libraries S173/S422, Y421 and Y439.

| Oligonucleotide | Library   | Sequence                                 |
|-----------------|-----------|------------------------------------------|
| Frag1_S173S_rev | S173/S422 | GATCGGTCTCCGTGCCAGAACCAGACCATTCTTGTTTTG  |
| Frag1_S173A_rev | S173/S422 | GATCGGTCTCCGTGCCAGAACCCGCCATTCTTGTTTTG   |
| Frag1_S173T_rev | S173/S422 | GATCGGTCTCCGTGCCAGAACCCGTCCATTCTTGTTTTG  |
| Frag1_S173D_rev | S173/S422 | GATCGGTCTCCGTGCCAGAACCCTCCATTCTTGTTTTG   |
| Frag1_S173V_rev | S173/S422 | GATCGGTCTCCGTGCCAGAACCAACCATTCTTGTTTTG   |
| Frag1_S173G_rev | S173/S422 | GATCGGTCTCCGTGCCAGAACCACCCATTCTTGTTTTG   |
| Frag1_S173L_rev | S173/S422 | GATCGGTCTCCGTGCCAGAACCAGCCATTCTTGTTTTG   |
| Frag1_S173W_rev | S173/S422 | GATCGGTCTCCGTGCCAGAACCCACCATTCTTGTTTTG   |
| Frag1_S173F_rev | S173/S422 | GATCGGTCTCCGTGCCAGAACCGAACCCATTCTTGTTTTG |
| Frag2_fwd       | S173/S422 | GATCGGTCTCGGCACGTTAACAAAAGATGGTAAAGTTCG  |
| Frag2_S422S_rev | S173/S422 | GATCGGTCTCGAGGTACAGCAAAGTGAGAATACGTAATG  |
| Frag2_S422A_rev | S173/S422 | GATCGGTCTCGAGGTACAGCAAAGTGCGCATACGTAATG  |
| Frag2_S422H_rev | S173/S422 | GATCGGTCTCGAGGTACAGCAAAGTGGTGATACGTAATG  |
| Frag2_S422F_rev | S173/S422 | GATCGGTCTCGAGGTACAGCAAAGTGAAAATACGTAATG  |
| Frag2_S422G_rev | S173/S422 | GATCGGTCTCGAGGTACAGCAAAGTGACCATACGTAATG  |
| Frag2_S422Q_rev | S173/S422 | GATCGGTCTCGAGGTACAGCAAAGTGCTGATACGTAATG  |
| Frag2_S422T_rev | S173/S422 | GATCGGTCTCGAGGTACAGCAAAGTGGGTATACGTAATG  |
| Frag2_S422V_rev | S173/S422 | GATCGGTCTCGAGGTACAGCAAAGTGAACATACGTAATG  |
| Frag2_S422L_rev | S173/S422 | GATCGGTCTCGAGGTACAGCAAAGTGCAGATACGTAATG  |
| Frag2_S422W_rev | S173/S422 | GATCGGTCTCGAGGTACAGCAAAGTGCCAATACGTAATG  |
| Frag3_fwd       | S173/S422 | GATCGGTCTCTACCTCAAACAAAAGGCG             |
| Y421A-f         | Y421      | GATAAAACATTTACGcgTCTCACTTTGCTGTACCTCA    |
| Y421V-f         | Y421      | GATAAAACATTTACGgtTCTCACTTTGCTGTACCTCA    |
| Y421I-f         | Y421      | GATAAAACATTTACGatcTCTCACTTTGCTGTACCTCA   |
| Y421L-f         | Y421      | GATAAAACATTTACGctgTCTCACTTTGCTGTACCTCA   |
| Y421M-f         | Y421      | GATAAAACATTTACGatgTCTCACTTTGCTGTACCTCA   |
| Y421F-f         | Y421      | GATAAAACATTTACGttcTCTCACTTTGCTGTACCTCA   |
| Y421W-f         | Y421      | GATAAAACATTTACGtgTCTCACTTTGCTGTACCTCA    |
| Y421G-f         | Y421      | GATAAAACATTTACGgtTCTCACTTTGCTGTACCTCA    |
| Y421N-f         | Y421      | GATAAAACATTTACGaacTCTCACTTTGCTGTACCTCA   |
| Y421D-f         | Y421      | GATAAAACATTTACGgacTCTCACTTTGCTGTACCTCA   |
| Y421K-f         | Y421      | GATAAAACATTTACGaaaTCTCACTTTGCTGTACCTCA   |
| Y439A-f         | Y439      | GTCGTTATTACAAGCcgATGACAAATAGAGGC         |
| Y439V-f         | Y439      | GTCGTTATTACAAGCgttATGACAAATAGAGGC        |
| Y439I-f         | Y439      | GTCGTTATTACAAGCcatcATGACAAATAGAGGC       |
| Y439L-f         | Y439      | GTCGTTATTACAAGCctgATGACAAATAGAGGC        |
| Y439M-f         | Y439      | GTCGTTATTACAAGCcatgATGACAAATAGAGGC       |
| Y439F-f         | Y439      | GTCGTTATTACAAGCcttcATGACAAATAGAGGC       |
| Y439W-f         | Y439      | GTCGTTATTACAAGCctggATGACAAATAGAGGC       |
| Y439G-f         | Y439      | GTCGTTATTACAAGCggtATGACAAATAGAGGC        |
| Y439N-f         | Y439      | GTCGTTATTACAAGCcaacATGACAAATAGAGGC       |
| Y439D-f         | Y439      | GTCGTTATTACAAGCgacATGACAAATAGAGGC        |
| Y439K-f         | Y439      | GTCGTTATTACAAGCaaaATGACAAATAGAGGC        |

Supplementary figure S2

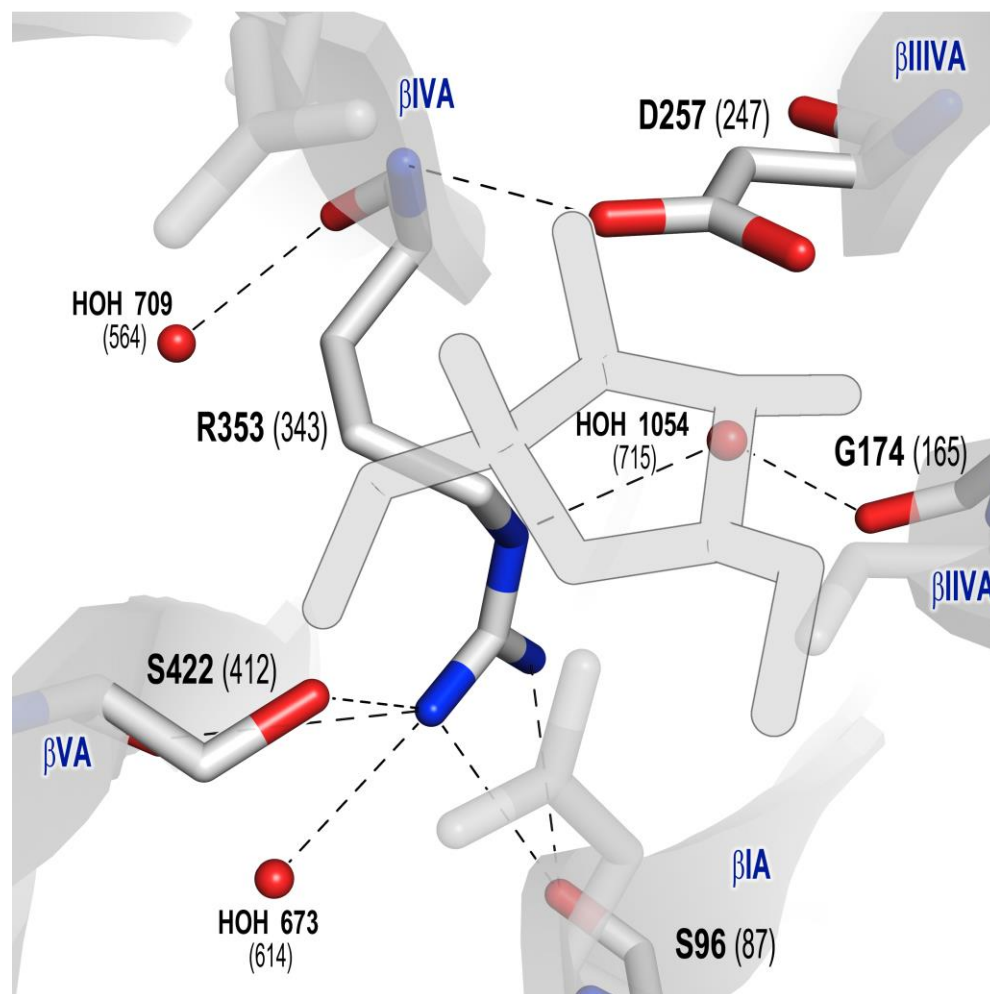

**Supplementary figure S2.** Contacts of R353 (343 in *B. subtilis* levansucrase) are shown based on PDB 1pt2. Only the fructose moiety is displayed for clarity. Waters (in red) in the active site are conserved in *B. subtilis* (1pt2) and *B. megaterium* (3om2) enzymes.

Supplementary figure S3

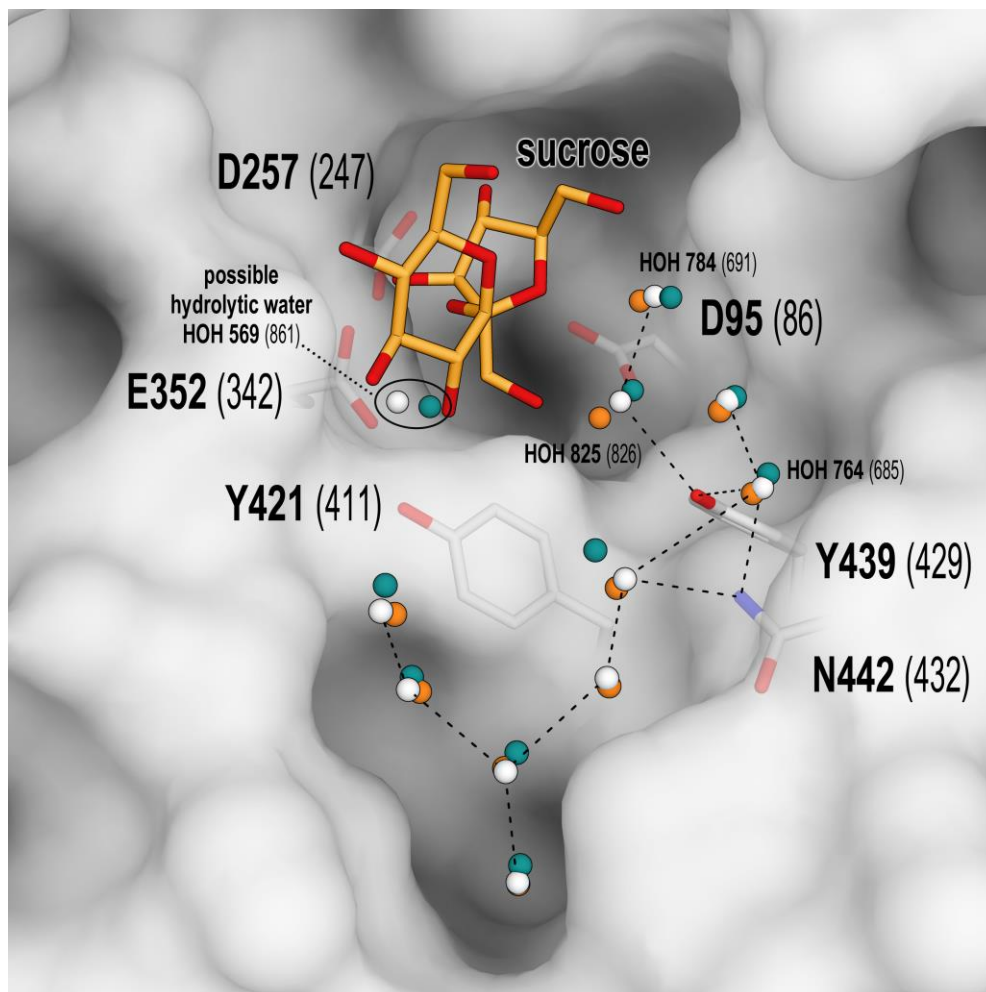

**Supplementary figure S3.** Water channel to the active site. Waters from *B. subtilis* sucrose-unbound (1oyg) and bound- (1pt2) levansucrase crystallographic structures are depicted in white and orange, respectively. Waters from *B. megaterium* (3om2) 3D structure are displayed in cyan. Sticks and Surface are from 1oyg, sucrose from 1pt2. Distances are  $< 4 \text{ \AA}$  (only 1oyg distances shown). Only conserved waters are shown.
